# Supplementary material for: The transition from local to global patterns governs the differentiation of mouse blastocysts
Source: PLOS journal article supplement (doi:10.1371/journal.pone.0233030), 2020-05-15
Supplement: S1 (10.1371/journal.pone.0233030.s001) [file journal.pone.0233030.s001.pdf]

# 1 **S1 Supplementary Information text: Full description of the data**

## 2 **analysis**

3 In this supplementary information, we provide a full description of the different steps of our  
4 data analysis. This includes the arguments for the choice of a particular approach as well as the  
5 sensitivity of the output of each approach to its input parameters. Investigating the sensitivity of a  
6 method increases our understanding of the relationship between input and output variables.  
7 Furthermore, it provides information on the robustness of the approach.

8 In the following, we consider the four main parts of our analyses:

- 9 1. Normalization of expression values and classification of cell populations
- 10 2. Determining cell neighbours with the Delaunay Cell Graph (DCG)
- 11 3. Correlations of expression levels of neighbouring cells
- 12 4. Rule-based simulations of population composition in ICM of early blastocysts

13

### 14 **1. Normalization of expression values and classification of cell populations**

15 The imaging data for the embryos was generated in four batches corresponding to different  
16 imaging sessions and/or stainings. The mounting of the embryos for imaging resulted in a slight  
17 squeezing along the z-axis of the image and hence extension along x and y (Fig S1, Step 3(i)). We  
18 checked for fluorescence intensity decay along the z-axis for each batch. As this decay was minimal  
19 due to the mounting of the embryos, intensity adjustment along z was not performed (Fig 1).

20 We assumed that the embryos that do not have fully segregated epiblast and primitive  
21 endoderm should be spherical (early and mid blastocysts). Based on this assumption, we calculated  
22 the deviation from sphericity for each of these embryos and rescaled the coordinates of the cell nuclei  
23 to obtain spherical embryos. Embryos with segregated epiblast and primitive endoderm have hatched  
24 from the zona and are elongated (late blastocysts). To rescale the coordinates of these late stage

25 embryos, we calculated for each batch the median rescaling factors for x, y and z of the early and mid  
 26 blastocysts and applied these to the late blastocysts.  
 27

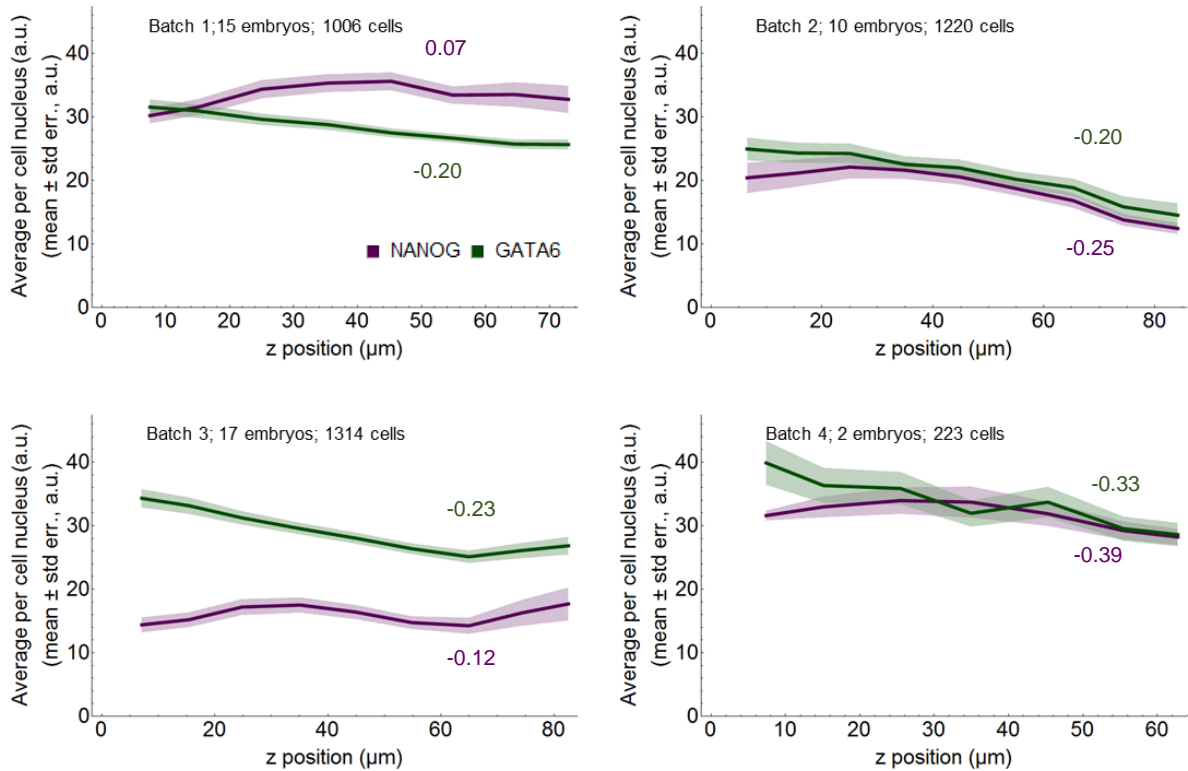

28 **Fig 1: Fluorescence intensity distribution along the z-axis.** Mean level of NANOG (purple) or GATA6 (green) (y-  
 29 axis) fluorescence intensity in each cell (ICM and TE) versus its z position within the imaged z-stack in each of the  
 30 four imaged embryo batches. The z position data are binned in 10 µm intervals. The shaded regions display the  
 31 standard error of the mean. Batch, embryo and total cell numbers are indicated. Coloured numbers indicate the  
 32 Spearman correlation values between NANOG (purple) and GATA6 (green) levels. Note that all values show a  
 33 very weak or weak correlation indicating no evident decay of fluorescence intensity in deeper z positions.

34

35 Plotting the mean GATA6 expression levels versus the mean NANOG expression levels for all  
 36 nuclei in the four imaging batches, we observed a shift in the data related to the batch number (Fig S1,  
 37 Step 2). To align the data obtained from the four independent sessions, we established thresholds for  
 38 NANOG and GATA6 expression for each batch, based on the data distribution in late stage embryos,  
 39 where Epiblast (Epi) and Primitive Endoderm (PrE) are completely separated and no double positive  
 40 (DP) cells occur. The thresholds were manually adjusted. The criterion was to determine the minimal

41 NANOG and GATA6 value, respectively, such that there are no double positive cells in late blastocysts  
42 (see Fig 3).

43

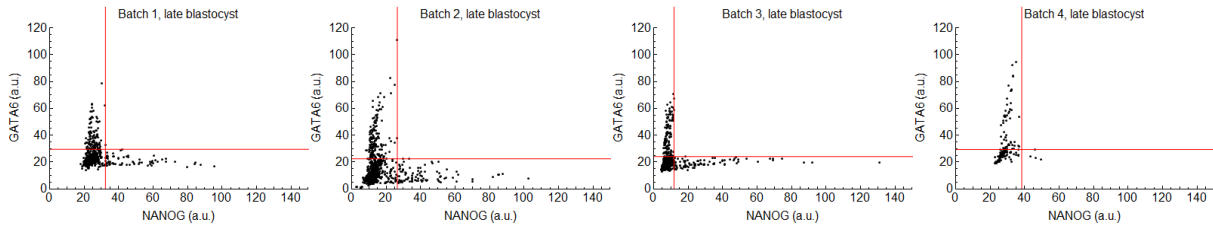

44

45 **Fig 3: Population thresholds.** Raw data for NANOG and GATA6 expression in single cells in arbitrary units (a.u.)  
46 in late embryos for the four batches (black) and the manually set thresholds to determine the four populations  
47 (red).

48

49 Based on the thresholds, we linearly shifted the data of all batches and all stages, such that all  
50 thresholds fall on top of each other. Since the range of the data does not vary much between batches,  
51 we consider such a linear transformation most appropriate. This changes the absolute intensity levels  
52 for each embryo but it does not change the relative intensity values in an embryo, which is the value  
53 that is relevant for our analysis. Based on the thresholds for GATA6 and NANOG, all cells were classified  
54 as double negative (DN: N- and G-), NANOG+/GATA6- (N+G-), NANOG-/GATA6+ (N-G+) and double  
55 positive (DP: N+, G6+). We applied the same method to the *Nanog* mutant data set to align the  
56 thresholds obtained from the data obtained in the five imaging sessions.

57 We also tested the k-means clustering used in [1] to determine the thresholds for our WT  
58 embryo data set as well as for the *Nanog* mutant data sets. Unfortunately, for the mutant data set, the  
59 clustering approach gave unreasonable results, including a large proportion of DN cells. Therefore, we  
60 decided to use the manually adjusted approach that works for both cases.

61 For the [1] data set, the imaging was performed in small dishes that didn't require the  
62 mounting of the embryos, hence a rescaling was not required. Instead, the data set was corrected for  
63 the decrease in intensity along z. Furthermore, Saiz et al. employed a k-means clustering for the  
64 population assignment of their data. We took the corrected data set and population assignment from

65 [1] to perform our neighbourhood analyses. We noticed that there were some oversaturated nuclei  
66 images and hence excluded all NANOG and GATA6 levels from the distribution that were two standard  
67 deviations away from the respective mean. The remaining analysis was analogous to our data.

68

## 69 **2. Determining cell neighbours with the Delaunay Cell Graph (DCG)**

70 We recently proposed two approaches to model the cell neighbourhood [2]: the Proximity Cell  
71 Graph (PCG), which provides a purely distance-based description of the cell neighbourhood and the  
72 Delaunay Cell Graph (DCG), in which neighbourhood is determined by the Delaunay triangulation. The  
73 Delaunay triangulation and its dual, the Voronoi tessellation, are routinely used to approximate the  
74 nearest neighbours of a cell [2–4]. The Delaunay cell graph (DCG) is given by  $DCG(V, E)$  where  $V$  is the  
75 vertex set and  $E$  is the edge set of the graph. An edge  $(u, w) \in E$  exists between two vertices  $u \in V$   
76 and  $w \in V$  if the corresponding points are connected by a line in the Delaunay triangulation and the  
77 Euclidean distance between  $u$  and  $w$  is less than a given threshold, which we chose as  $30 \mu\text{m}$  (three  
78 times the average diameter of a cell nucleus). To validate that the distance between the centroids of  
79 two neighbouring cells is at least  $10 \mu\text{m}$ , we calculated this distance between all neighbouring cells in  
80 the ICM (and their TE neighbours) for all embryos in data set I and II (Fig 3). These values fall within  
81 the reported segmentation errors obtained with MINS [5], increasing in later embryos.

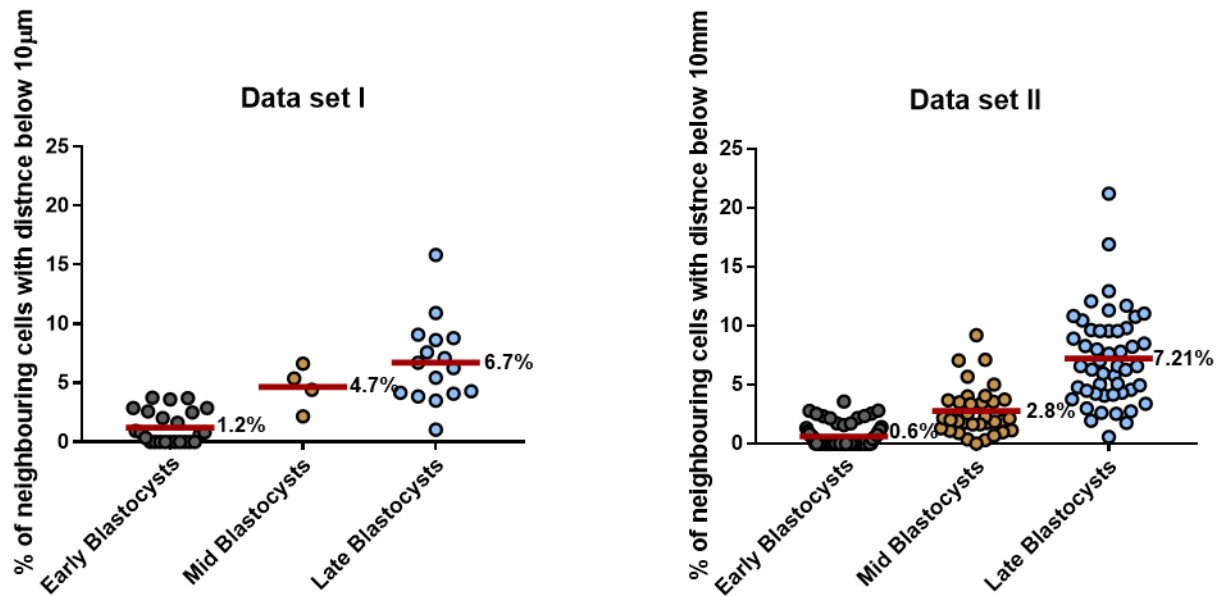

82

83 **Fig 3: Percentage of cells with a distance below 10  $\mu\text{m}$  in data set I and II.** Each dot represents the percentage  
 84 of distances of a cell to all its neighbours that fall below 10  $\mu\text{m}$  in one embryo. The horizontal red line represents  
 85 the average percentage within each developmental stage (numerical value is also shown).

86

87 In a preliminary study to decide whether to use the Proximity Cell Graph (PCG) and/or the  
 88 Delaunay Cell Graph (DCG) in mouse embryos, we generated a number of artificial shapes (ball, oblate  
 89 spheroid, prolate spheroid, cuboid and box) and analysed the number of edges versus the number of  
 90 vertices. As expected, we found that the number of edges in the PCG increases unreasonably with  
 91 increasing number of vertices [2]. Furthermore, by definition, the PCG is completely dependent on the  
 92 cut off length. PCG approximation was used in a recent study on a model for early cell lineage  
 93 specification in mouse embryos with neighbour type simulations [6]. The authors assume in their  
 94 simulations that the cells are non-overlapping spheres with a certain radius and a cut off length 1.2  
 95 times the sum of the radii of the two cells. This is essentially if the spheres touch or almost touch. For  
 96 a tissue with polygonal cells of different sizes like the ones found in mouse embryos, it is not trivial to  
 97 determine an appropriate cut off length to obtain the nearest neighbours. The DCG is less sensitive to  
 98 the cut off length and for cells in the centre of the embryo like in the ICM, the cut off length is irrelevant  
 99 unless it is unreasonably small. Therefore, we decided to analyse the embryo data using the DCG.

100 We employed the DCG on the pre-processed nuclei centre of mass. For a given cell (vertex in  
 101 the cell graph), the neighbouring cells are represented by the vertices that are connected through  
 102 edges. In all our analyses, the set of neighbouring cells consists of all ICM cells and the TE cells that are  
 103 neighbours to at least one ICM cell (Fig S1, Step4).

104 To evaluate the neighbour assignment of the DCG in the mouse embryos, we compared the  
 105 results for the ICM cells of four early, three mid and two late embryos to a manual assignment included  
 106 in our data set (Fig 4, and see Sup. Videos 1-3). For the manual assignment, we considered cells as  
 107 neighbours if they are touching, identified by the membrane staining. The manual assignment only  
 108 provides an indication. Judging the three-dimensional neighbourhood of the cells from slices of two-  
 109 dimensional images is very difficult and gets even more challenging as the cell density and the  
 110 irregularity of the cellular geometry increase with stage. We find that the accuracy of DCG compared  
 111 to the manual assignment is 91 % (early), 82% (mid) and 83% (late) (see Table 1). We also found that  
 112 0 (early), 3 (mid) and 13 (late) cells were not detected as neighbours by the automatic assignment  
 113 compared to the manual assignment due to errors in the segmentation method used (MINS). Hence,  
 114 if the cells were segmented correctly, the DCG did not miss a neighbourhood relationship. We conclude  
 115 that for all stages, the DCG provides a robust description of the local cell neighbourhood in the ICM  
 116 and a satisfactory approximation of which cells are touching.

117 **Table 1: Comparison of DCG neighbours to manual assignment of touching cells**

|                                    | Early (n=4) | Mid (n=3) | Late (n=2) |
|------------------------------------|-------------|-----------|------------|
| ICM cells                          | 50          | 67        | 79         |
| DCG neighbours                     | 543         | 751       | 1031       |
| Manual neighbours (touching)       | 495         | 617       | 851        |
| Accuracy:<br>Manual/DCG neighbours | 0.91        | 0.82      | 0.83       |

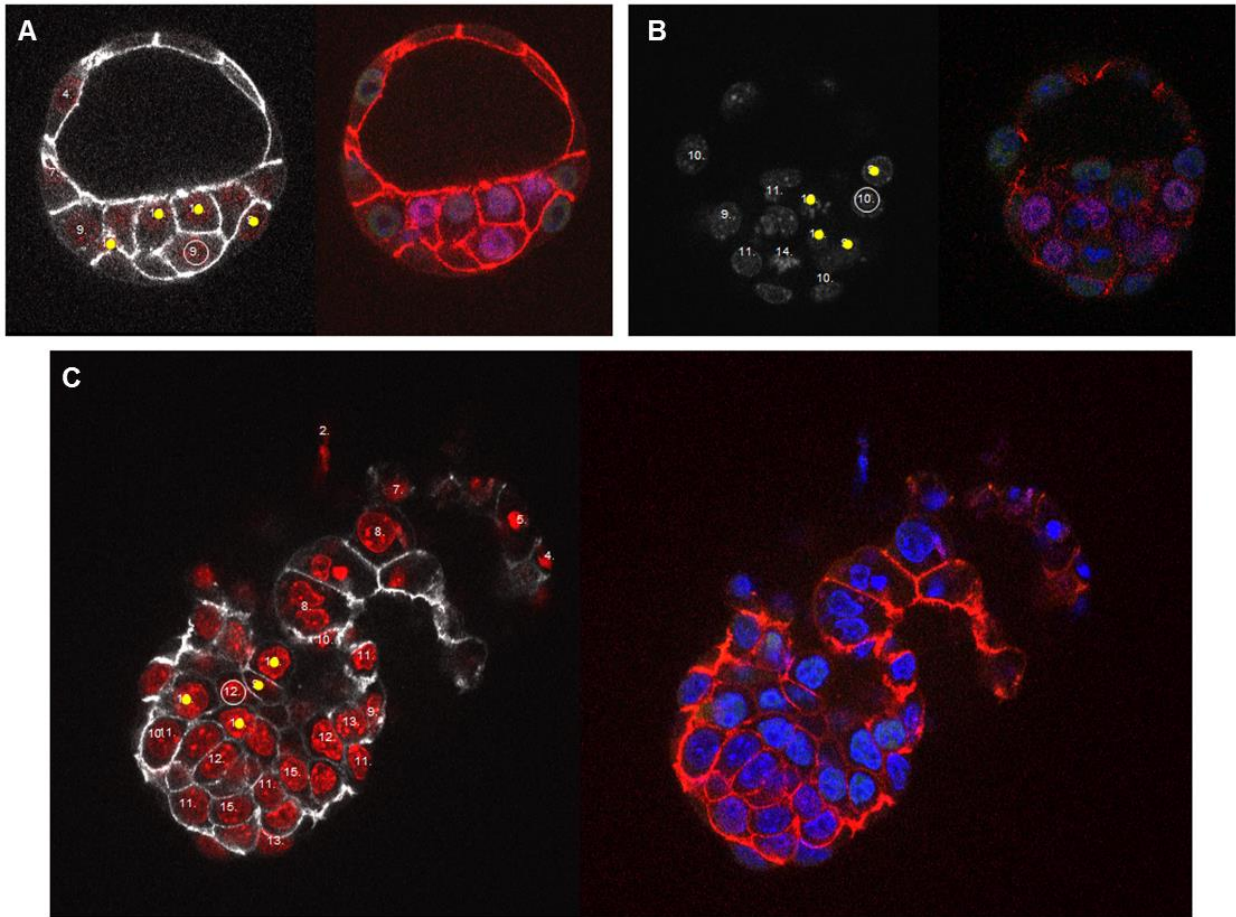

118

119 **Fig 4: z Sections of early (A), mid (B) and late (C) embryos comparing DGC neighbour assignment and**  
 120 **fluorescent immunostaining.** The left panels show membrane and/or nuclear staining. The yellow dots indicate  
 121 DGC calculated neighbouring cells of the cell with an encircled number, that number indicates its number of  
 122 neighbours; numbers in other cells indicate the number of neighbouring cells of that cell. The right panels show  
 123 the original confocal images of the embryos shown, stained for NANOG (magenta), GATA6 (green), DAPI (blue)  
 124 and  $\beta$ -catenin (membrane, red). Note that the embryos are upside down and not all the neighbours of the  
 125 indicated cell are located in the same z section. See Sup. Videos 1-3 for the complete z-stack.

126

127 Sensitivity of the DCG

128 We investigated the sensitivity of the number of neighbours provided by the DCG with respect  
 129 to cell density. We considered a ball of radius  $50\ \mu\text{m}$  and randomly filled it with non-overlapping  
 130 spheres of radius  $5\ \mu\text{m}$  to represent the cells. For these simulated cells, we generated the DCG. The  
 131 procedure was repeated ten times for cell numbers ranging from 10 to 400 in steps of 10, resulting in

132 cell densities ranging from  $1.9 \times 10^{-5} \text{ cells}/\mu\text{m}^3$  to  $76.43 \times 10^{-5} \text{ cells}/\mu\text{m}^3$ . For comparison, manual  
133 inspection of the ICM cells resulted in a cell density of  $4 \times 10^{-5} \text{ cells}/\mu\text{m}^3$  in early embryos and  
134  $20 \times 10^{-5} \text{ cells}/\mu\text{m}^3$  in mid embryos.

135 For the simulated DCGs, we find that for increasing cell density the average number of  
136 neighbours increases and plateaus at around 13 neighbours (Fig 5).

137

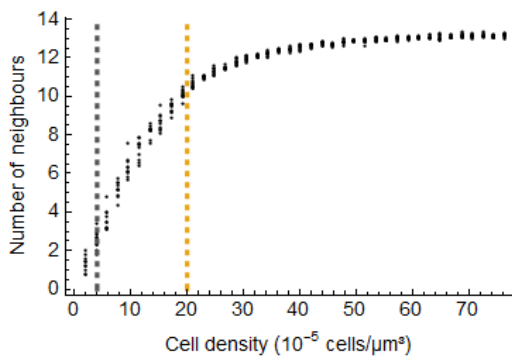

138

139 **Fig 5: The mean number of neighbours derived from the DCG plateaus for high cell densities.** Each dot  
140 represents the mean number of neighbours of one simulated DCG. The vertical lines indicate the manually  
141 obtained cell densities in ICM of early (grey) and mid (yellow) blastocysts.

142

### 143 3. Correlations of expression levels of neighbouring cells

144 To relate the expression levels of a given cell to the expression levels of all its neighbours (both  
145 TE and ICM), we calculated Spearman's correlation coefficient of the expression levels of a cell and the  
146 median expression levels of its neighbours. We chose to use median level in the neighbours in  
147 combination with Spearman's correlation coefficient as we reasoned that this measurement was the  
148 variable, which made the least assumptions about the type of signals that might be regulating the  
149 observed correlations. Furthermore, the median provides a more robust measure than the sum of all  
150 signals as the median goes up slower and is also less sensitive to outliers than the sum. Spearman's  
151 correlation coefficient does not require normally distributed data.

152 To determine whether the obtained correlations are statistically significant, we performed a  
153 bootstrap resampling of the correlation coefficients of our data and compared the result with



154 correlation coefficients of a null model. For the bootstrapping, we resampled the experimental data to  
155 create 100 different data sets.

156

157 Sensitivity of the correlation analysis:

158 Spearman's rank correlation coefficient is the Pearson correlation coefficient after the two  
159 variables have been separately transformed to ranks while retaining their pairing [7]. The value of the  
160 correlation coefficient is affected by a number of factors, in particular the sample size [8]. Therefore,  
161 we explored the sensitivity of the correlation value to the number of cells analysed. We know that for  
162 a random distribution, the correlation value is zero. To test whether this analysis might be affected by  
163 the topological properties of small DCG given the specific constraints on cell number, we used 100  
164 artificially generated DCGs. These artificial DCGs consisted of cell numbers 10 to 400 in steps of 10 and  
165 randomly assigned expression levels to each cell based on the uniform distribution over [0,1]. For each  
166 DCG, we then calculated the correlation value and determined the mean correlation value for DCGs  
167 with the same cell number. We find that if the number of cells analysed increases, the mean correlation  
168 coefficient approaches zero (Fig 6). Hence, if the number of cells is large enough, the correlation  
169 analysis is consistent.

170 Next, we investigated how the number of cells in the analysis is linked to the deviation of the mean  
171 correlation from zero. Fitting the function  $f(x) = -\frac{a}{x} - b$  resulted in  $a=2.19$  and  $b=0.0098$ . Based on  
172  $f(x)$ , we estimated that on average, we need at least 108 cells in the analysis to obtain at most 3%  
173 deviation (Fig 6). Less cells will lead to more noise in the correlation analysis, while more cells will  
174 increase the precision. We chose 3 % as the threshold, since this is the point where the functions levels  
175 off.

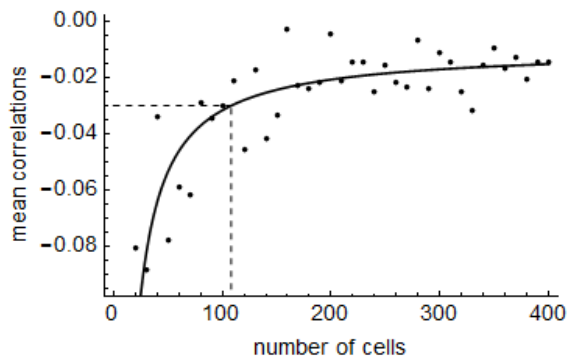

176

177 **Fig 6: More than 108 analysed cells results in an average deviation of less than 3%.** Mean correlation  
 178 coefficients for 100 artificially generated DCGs of 10 to 400 cells in steps of 10 with expression levels drawn from  
 179 the uniform distribution over [0,1] (dots). The continuous line indicates the fitted curve  $f(x) = -\frac{2.19}{x} - 0.0098$   
 180 and the intersection of  $f(x)$ . The 3% threshold is marked by the dashed line.

181

182 The ICM has  $20 \pm 1$  cells in early,  $24 \pm 1$  cells in mid, and  $45 \pm 4$  cells in late embryos. Due to  
 183 these small numbers, analysing the correlations individually in each embryo does not provide reliable  
 184 results. Hence, we pooled the data for all cells, expecting a reliable result if the number of pooled cells  
 185 is at least 108.

186

187 Null model for correlations:

188 The correlation analysis for the experimental data results in non-zero values. To test whether  
 189 these results might be affected by specific constraints on NANOG/GATA6 distributions, we investigated  
 190 whether the correlation values are significantly different from those of a null model. For the null model,  
 191 we assumed the embryo geometry is given by the experimental data, hence we used the measured  
 192 coordinates of the cells. The expression levels of the TE cells were also based on the experimental data.  
 193 To assess the effect of NANOG/GATA6 distribution, we generated several different models using  
 194 different assignment rules for the NANOG and GATA6 values of the ICM cells:

195 • Random model 1: The NANOG and GATA6 values of the ICM cells are randomly drawn from  
 196 the uniform distribution over [0,1].

197 • Random model 2: The values of the ICM of each embryo are shuffled randomly.

198 • Random model 3: We generate the distributions for NANOG and GATA6 from all ICM cells of  
199 all embryos at all stages. The values of an ICM cell are randomly drawn from these distributions.

200 • Random model 4: We generate the distributions for NANOG and GATA6 from all ICM cells of  
201 all embryos of a given stage. This results in six distributions one for each stage for NANOG and GATA6,  
202 respectively. For a cell in the ICM of a given embryo, the values for NANOG and GATA6 are randomly  
203 drawn from the corresponding distribution depending on the stage of the embryo.

204 • Random model 5: The values of the ICM cells of all embryos in each stage are randomly  
205 shuffled.

206

207 We generated each model for all the embryos in our data set, pooled all the cells in the ICM  
208 from one stage and calculated the correlations of these cells with their neighbours both for NANOG  
209 (Table 2) and GATA6 (Table 3). This procedure was repeated 100 times. We expect very low correlation  
210 values for the random models.

211 **Table 2: Correlation values for different random assignments of NANOG expression (mean  $\pm$  standard**  
212 **deviation)**

| Model          | Early              | Mid             | Late              |
|----------------|--------------------|-----------------|-------------------|
| Random model 1 | -0.0006 $\pm$ 0.04 | 0.15 $\pm$ 0.01 | 0.25 $\pm$ 0.003  |
| Random model 2 | 0.2 $\pm$ 0.04     | 0.04 $\pm$ 0.08 | 0.3 $\pm$ 0.05    |
| Random model 3 | -0.005 $\pm$ 0.05  | -0.02 $\pm$ 0.1 | -0.004 $\pm$ 0.04 |
| Random model 4 | -0.009 $\pm$ 0.04  | -0.02 $\pm$ 0.1 | -0.02 $\pm$ 0.04  |
| Random model 5 | 0.003 $\pm$ 0.06   | 0.002 $\pm$ 0.1 | -0.01 $\pm$ 0.04  |

213

214

215

216

217

218

219 **Table 3: Correlation values for different random assignments of GATA6 expression (mean  $\pm$  standard deviation)**

| Model                                  | Early              | Mid              | Late               |
|----------------------------------------|--------------------|------------------|--------------------|
| Random model 1<br>(identical to above) | -0.0006 $\pm$ 0.04 | 0.14 $\pm$ 0.01  | 0.25 $\pm$ 0.003   |
| Random model 2                         | 0.6 $\pm$ 0.01     | 0.4 $\pm$ 0.07   | 0.4 $\pm$ 0.04     |
| Random model 3                         | -0.005 $\pm$ 0.05  | 0.0003 $\pm$ 0.1 | -0.0001 $\pm$ 0.04 |
| Random model 4                         | -0.001 $\pm$ 0.05  | -0.02 $\pm$ 0.1  | 0.002 $\pm$ 0.04   |
| Random model 5                         | -0.004 $\pm$ 0.05  | 0.004 $\pm$ 0.1  | 0.006 $\pm$ 0.04   |

220

221 We find that Random model 2 exhibits larger correlation values than the other models. This  
 222 indicates that reshuffling the values of the ICM cell in each embryo individually does not introduce a  
 223 sufficient randomization, due to the small number of cells in the ICM.

224 All the other models show similar results with values close to zero as expected from a random  
 225 model. For all subsequent analyses shown in the main text, we used the method of Random model 3  
 226 to calculate the null models for the neighbour correlations, rather than models 1, 4 or 5. The main  
 227 reasons for this are that Random model 3 relies on the original data (unlike Random model 1) and its  
 228 calculation is more straightforward, because we only need to consider two distributions for the data  
 229 (one for NANOG and one for GATA6) rather than six as for Random models 4 and 5.

230 The correlation values for Random model 3 for the different experimental conditions are  
 231 summarised in Tables 4 and 5.

232

233

234

235

236

237

238 **Table 4: Correlation values for Random model 3 for wild-type and NANOG mutant analyses (mean  $\pm$  standard**  
 239 **deviation)**

| Experimental condition                                                     | Correlations       |                    |                    |
|----------------------------------------------------------------------------|--------------------|--------------------|--------------------|
|                                                                            | Early              | Mid                | Late               |
| Our data (NANOG cell, NANOG neighbours)                                    | -0.005 $\pm$ 0.05  | -0.02 $\pm$ 0.1    | 0.004 $\pm$ 0.04   |
| Our data (GATA6 cell, GATA6 neighbours)                                    | -0.005 $\pm$ 0.05  | 0.0003 $\pm$ 0.1   | -0.0001 $\pm$ 0.04 |
| Our data (NANOG cell, GATA6 neighbours)                                    | -0.003 $\pm$ 0.04  | -0.005 $\pm$ 0.1   | 0.006 $\pm$ 0.04   |
| Our data (GATA6 cell, NANOG neighbours)                                    | -0.002 $\pm$ 0.05  | -0.02 $\pm$ 0.1    | -0.0004 $\pm$ 0.04 |
| Saiz data (NANOG cell, NANOG neighbours)                                   | -0.0005 $\pm$ 0.03 | 0.001 $\pm$ 0.04   | -0.0008 $\pm$ 0.03 |
| Saiz data (GATA6 cell, GATA6 neighbours)                                   | -0.002 $\pm$ 0.03  | -0.008 $\pm$ 0.03  | 0.0001 $\pm$ 0.03  |
| Saiz data (NANOG cell, GATA6 neighbours)                                   | -0.004 $\pm$ 0.03  | -0.002 $\pm$ 0.04  | -0.0006 $\pm$ 0.03 |
| Saiz data (GATA6 cell, NANOG neighbours)                                   | -0.004 $\pm$ 0.03  | -0.0009 $\pm$ 0.03 | -0.003 $\pm$ 0.03  |
| NANOG mutant analysis, WT and heterozygotes (GATA6 cell, GATA6 neighbours) | -0.0008 $\pm$ 0.04 | -0.02 $\pm$ 0.07   | 0.2 $\pm$ 0.03     |
| NANOG mutant analysis, mutants (GATA6 cell, GATA6 neighbours)              | -0.003 $\pm$ 0.08  | -0.03 $\pm$ 0.09   | -0.1 $\pm$ 0.04    |

240

241

242 **Table 5: Correlation values for Random model 3 for treated embryos (mean  $\pm$  standard deviation)**

| Experimental condition                                     | Correlation (no staging) |
|------------------------------------------------------------|--------------------------|
| Treatment analysis, control (NANOG cell, NANOG neighbours) | -0.003 $\pm$ 0.03        |
| Treatment analysis, control (GATA6 cell, GATA6 neighbours) | -0.001 $\pm$ 0.04        |
| Treatment analysis, PD03 (NANOG cell, NANOG neighbours)    | -0.003 $\pm$ 0.04        |
| Treatment analysis, PD03 (GATA6 cell, GATA6 neighbours)    | -0.005 $\pm$ 0.04        |

243

244 **4. Rule-based simulations of population composition in ICM of early blastocysts**

245 To generate the simulations of the four populations, we used the 64 early embryo data sets from  
 246 Saiz et al. For each ICM cell, we determined the simulated cell population type based on two rules and  
 247 kept the cell centroid and neighbours as obtained from the experimental data. We included the TE  
 248 cells that are neighbouring at least one ICM cell with their features obtained from the experimental  
 249 data. To obtain the population type for an ICM cell, we assigned it N+ or N- and G6+ or G6- expression  
 250 according to these two rules:

251 1) G6+ cells are clustered; the clustering is achieved by randomly setting the percentage of being  
 252 G6+ to 85 % and the rest to G6- ( $p_{GATA6} = 0.85$ );

253 2) cells with nine or close to nine neighbours are N+ up to 82 % ( $p_{NANOG} = 0.82$ ), the rest N-.

254 The values for  $p_{GATA6}$  and  $p_{NANOG}$  are obtained from the experimental data and are the proportion of  
 255 ICM cells positive for GATA6 or NANOG expression, respectively. Hence,  $p_{GATA6}$  is the proportion of  
 256 DP and N-G+ cells and  $p_{NANOG}$  is the proportion of DP and N+G- cells. Combining this information for  
 257 each cell, we determined its simulated population type.

258

259

260 Sensitivity of the four populations model:

261 The four populations model relies on three parameters:

- 262 1.  $p_{GATA6}$ , the proportion of GATA6 positive cells, i.e DP and N-G+ cells
- 263 2.  $p_{NANOG}$ , the proportion of NANOG positive cells, i.e DP and N+G- cells
- 264 3. startNumNeigh, the number of neighbours at which we start assigning NANOG positive fate
- 265 to the cells

266 We analysed the sensitivity of the model to the values of these three parameters. We varied  $p_{NANOG}$   
267 and  $p_{GATA6}$  between 0 and 1 in steps of 0.2 and startNumNeigh between 7 and 14 in steps of 1. For  
268 each parameter value combination, we performed 100 simulations. For each embryo, we calculated  
269 the mean distribution of populations of the 100 simulations. The mean population distributions are  
270 then summed up to obtain the total overall population distribution. This simulated total population  
271 distribution is then compared to the total population distribution from the experimental data. To  
272 assess the goodness of fit, we employed the mean squared error  $MSE = Mean((popDist_{Sim} -$   
273  $popDist_{Exp})^2)$ , where  $popDist_{Sim}$  is the population distribution of the simulations and  $popDist_{Exp}$   
274 the population distribution obtained from the experiments. For a better visualisation, we rescale the  
275 MSE and obtain the simulation match  $1 - \frac{MSE - Min(MSE)}{Max(MSE) - Min(MSE)}$ . Hence, a simulation match of 0  
276 corresponds to the parameter values with the worst match and a simulation match of 1 to the best  
277 match (Fig 7)

278

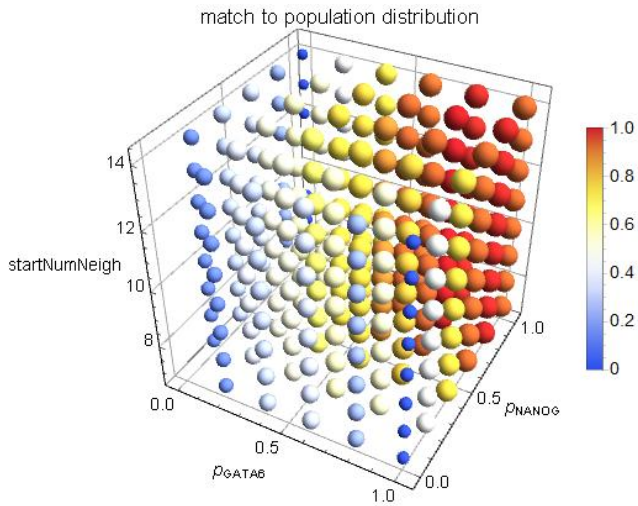

279

280 **Fig 7: Higher values of  $p_{NANOG}$  and  $p_{GATA6}$  provide a better match of the simulations to the experimental data.**

281 Simulation match to experimental data from early embryos (normalized to [0,1]) for the four populations model,  
 282 varying  $p_{NANOG}$  and  $p_{GATA6}$  between 0 and 1 and startNumNeigh between 7 and 14.

283

284 Varying startNumNeigh independently showed the best match for 14, followed by 9 (Fig 8A).

285 Plotting the population distributions however showed that the differences between the simulations  
 286 are negligible (Fig 8B).

287

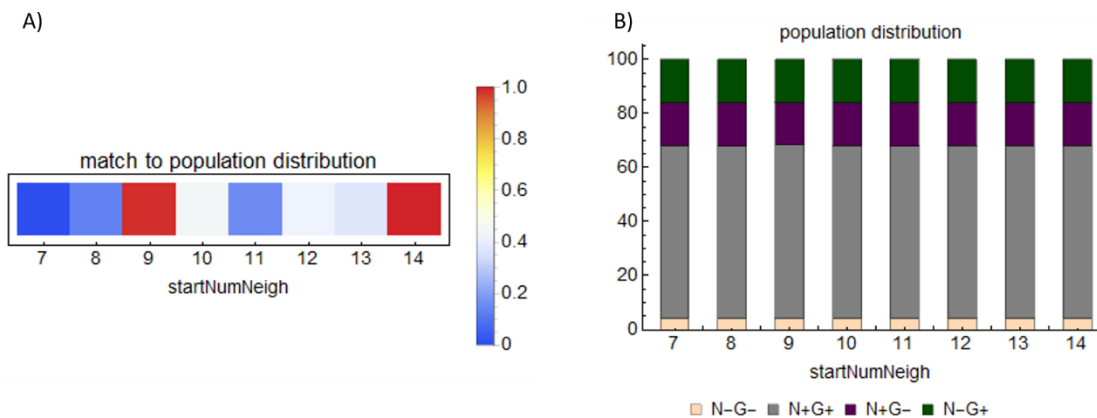

288

289 **Fig 8: The four populations model is robust with respect to the parameter startNumNeigh.** Simulation match  
 290 to experimental data from early embryos (normalized to [0,1]) (A) and population distributions (B) for the four  
 291 populations model for  $p_{NANOG} = 0.8$  and  $p_{GATA6} = 0.8$  and startNumNeigh varying between 7 and 14.

292



293 Varying  $p_{NANOG}$  and  $p_{GATA6}$  shows that for values between 0.6 and 1 for both parameters, we  
 294 obtain a reasonable fit, with the best fit for  $p_{NANOG} = 0.8$  and  $p_{GATA6} = 0.8$  (Fig 9A). Plotting the  
 295 population distribution for the simulations of these nine parameter combinations, shows that  
 296 increasing the values for  $p_{NANOG}$  or  $p_{GATA6}$  changes the composition of the populations in the  
 297 simulated ICMs (Fig 9B). If  $p_{NANOG}$  or  $p_{GATA6}$  is one, only up to two populations arise. For values below  
 298 one for  $p_{NANOG}$  and  $p_{GATA6}$ , the four populations arise and become more evenly distributed the  
 299 smaller the values are.

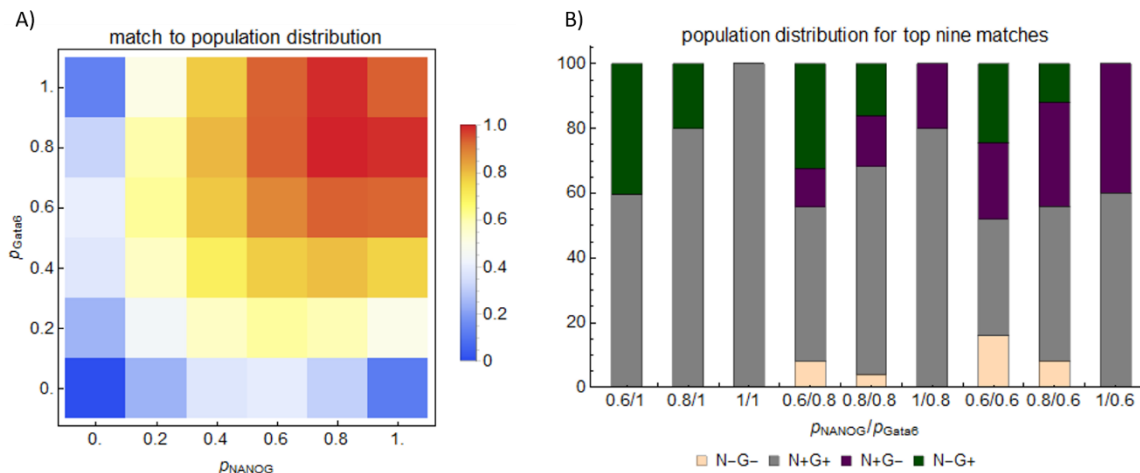

300  
 301 **Fig 9: The values of  $p_{NANOG}$  and  $p_{GATA6}$  determine the population distributions in the simulated ICMs.**  
 302 Simulation match to experimental data from early embryos (normalized to [0,1]) (A) and population distributions  
 303 for the top nine matches (B) for the four populations model for  $startNumNeigh = 9$  and  $p_{NANOG}$  and  $p_{GATA6}$   
 304 varying between 0 and 1.

305

## 306 References:

307 1. Saiz N, Williams KM, Seshan VE, Hadjantonakis A-K. Asynchronous fate decisions by single  
 308 cells collectively ensure consistent lineage composition in the mouse blastocyst. Nat  
 309 Commun. 2016;7: 13463. doi:10.1038/ncomms13463  
 310 2. Schmitz A, Fischer SC, Mattheyer C, Pampaloni F, Stelzer EHK. Multiscale image analysis  
 311 reveals structural heterogeneity of the cell microenvironment in homotypic spheroids. Sci  
 312 Rep. 2017;7: 43693. doi:10.1038/srep43693

- 313 3. Kaliman S, Jayachandran C, Rehfeldt F, Smith A-S. Limits of Applicability of the Voronoi  
314 Tessellation Determined by Centers of Cell Nuclei to Epithelium Morphology. *Front Physiol.*  
315 2016;7: 551. doi:10.3389/fphys.2016.00551
- 316 4. Schaller G, Meyer-Hermann M. Multicellular tumor spheroid in an off-lattice Voronoi-  
317 Delaunay cell model. *Phys Rev E.* 2005;71: 051910. doi:10.1103/PhysRevE.71.051910
- 318 5. Lou X, Kang M, Xenopoulos P, Muñoz-Descalzo S, Hadjantonakis AK. A rapid and efficient  
319 2D/3D nuclear segmentation method for analysis of early mouse embryo and stem cell image  
320 data. *Stem Cell Reports.* 2014;2: 382–397. doi:10.1016/j.stemcr.2014.01.010
- 321 6. Tosenberger A, Gonze D, Bessonard S, Cohen-Tannoudji M, Chazaud C, Dupont G. A  
322 multiscale model of early cell lineage specification including cell division. *npj Syst Biol Appl.*  
323 2017;3: 16. doi:10.1038/s41540-017-0017-0
- 324 7. Quinn GP, Keough MJ. *Experimental Design and Data Analysis for Biologists.* 2002 [cited 13  
325 Feb 2018]. Available: <http://www.cambridge.org>
- 326 8. Goodwin LD, Leech NL. Understanding Correlation: Factors That Affect the Size of  $r$ . *J Exp*  
327 *Educ.* 2006;74: 249–266. doi:10.3200/JEXE.74.3.249-266
- 328
- 329
- 330
