# Supplementary material for: The transition from local to global patterns governs the differentiation of mouse blastocysts
Source: PLOS journal article supplement (doi:10.1371/journal.pone.0233030), 2020-05-15

# Fig S3:

**A**

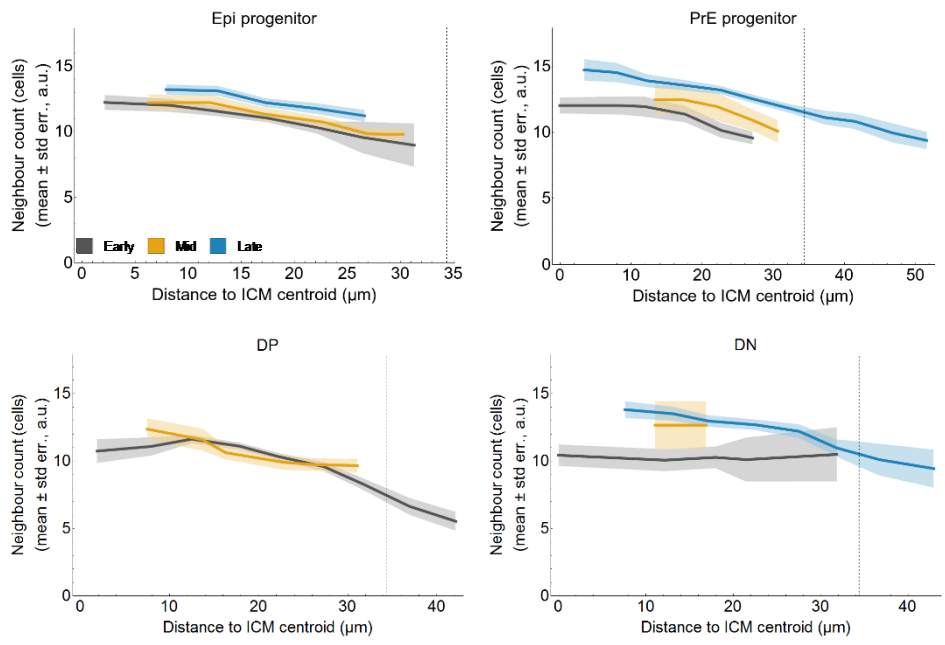

**B**

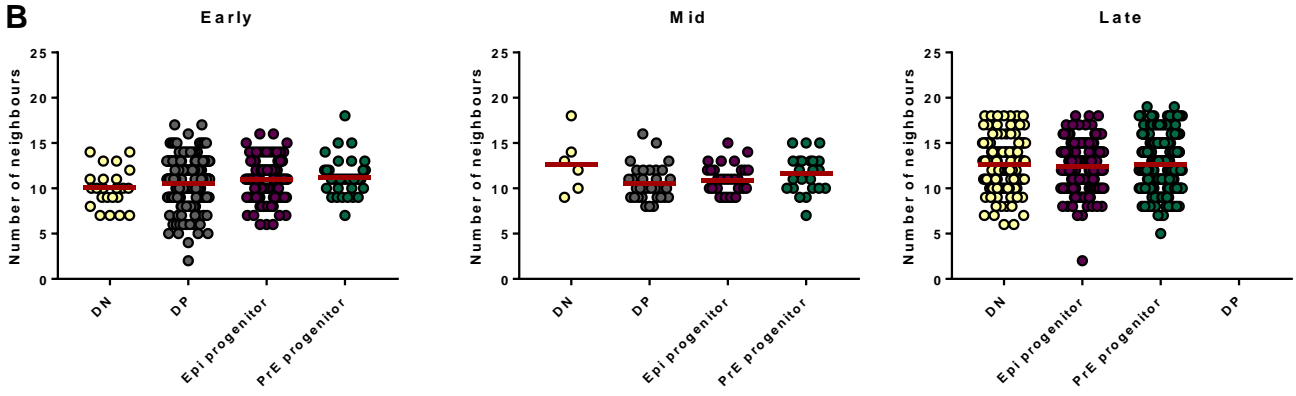

Supplement: S4 (10.1371/journal.pone.0233030.s004) [file journal.pone.0233030.s004.pdf]
