# Supplementary material for: The transition from local to global patterns governs the differentiation of mouse blastocysts
Source: PLOS journal article supplement (doi:10.1371/journal.pone.0233030), 2020-05-15
Supplement: S5 (10.1371/journal.pone.0233030.s005) [file journal.pone.0233030.s005.pdf]

# Fig S4:

| Early Blastocyst |                | Neighbour population type |          |                 |                 |  |          |                 |                 |  |                 |                 |  |                        |
|------------------|----------------|---------------------------|----------|-----------------|-----------------|--|----------|-----------------|-----------------|--|-----------------|-----------------|--|------------------------|
|                  |                | TE vs DN                  | TE vs DP | TE vs Epi prog. | TE vs PrE prog. |  | DN vs DP | DN vs Epi prog. | DN vs PrE prog. |  | DP vs Epi prog. | DP vs PrE prog. |  | Epi prog. vs PrE prog. |
| Cell type        | DN cell        | *                         | *        | *               | *               |  | *        | *               | ns              |  | ns              | *               |  | *                      |
|                  | DP cell        | *                         | *        | *               | *               |  | *        | *               | *               |  | *               | *               |  | *                      |
|                  | Epi prog. cell | *                         | *        | ns              | *               |  | *        | *               | *               |  | *               | *               |  | *                      |
|                  | PrE prog. cell | *                         | *        | *               | *               |  | *        | *               | *               |  | ns              | *               |  | *                      |

| Mid Blastocyst |                | Neighbour population type |          |                 |                 |  |          |                 |                 |  |                 |                 |  |                        |
|----------------|----------------|---------------------------|----------|-----------------|-----------------|--|----------|-----------------|-----------------|--|-----------------|-----------------|--|------------------------|
|                |                | TE vs DN                  | TE vs DP | TE vs Epi prog. | TE vs PrE prog. |  | DN vs DP | DN vs Epi prog. | DN vs PrE prog. |  | DP vs Epi prog. | DP vs PrE prog. |  | Epi prog. Vs PrE prog. |
| Cell type      | DN cell        | ns                        | *        | ns              | *               |  | *        | ns              | ns              |  | *               | ns              |  | ns                     |
|                | DP cell        | *                         | *        | *               | *               |  | *        | *               | *               |  | *               | *               |  | ns                     |
|                | Epi prog. cell | *                         | *        | ns              | *               |  | ns       | *               | *               |  | *               | *               |  | *                      |
|                | PrE prog. cell | *                         | *        | *               | *               |  | ns       | *               | *               |  | *               | *               |  | ns                     |

| Late Blastocyst |                | Neighbour population type |                 |                 |  |                 |                 |  |                        |
|-----------------|----------------|---------------------------|-----------------|-----------------|--|-----------------|-----------------|--|------------------------|
|                 |                | TE vs DN                  | TE vs Epi prog. | TE vs PrE prog. |  | DN vs Epi prog. | DN vs PrE prog. |  | Epi prog. Vs PrE prog. |
| Cell type       | DN cell        | ns                        | *               | *               |  | *               | *               |  | ns                     |
|                 | Epi prog. cell | *                         | *               | *               |  | *               | ns              |  | *                      |
|                 | PrE prog. cell | *                         | *               | ns              |  | ns              | *               |  | *                      |
