# Supplementary material for: The transition from local to global patterns governs the differentiation of mouse blastocysts
Source: PLOS journal article supplement (doi:10.1371/journal.pone.0233030), 2020-05-15
Supplement: S8 (10.1371/journal.pone.0233030.s008) [file journal.pone.0233030.s008.pdf]

# Fig. S7

**A**

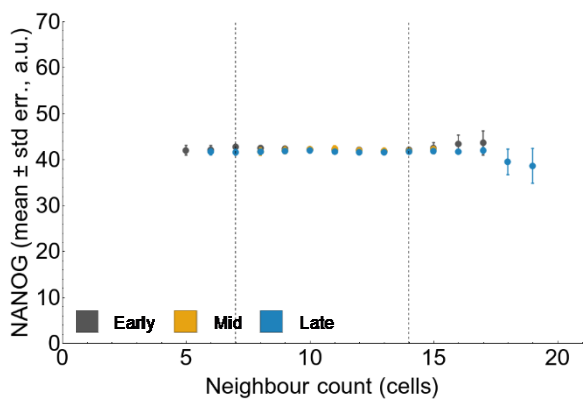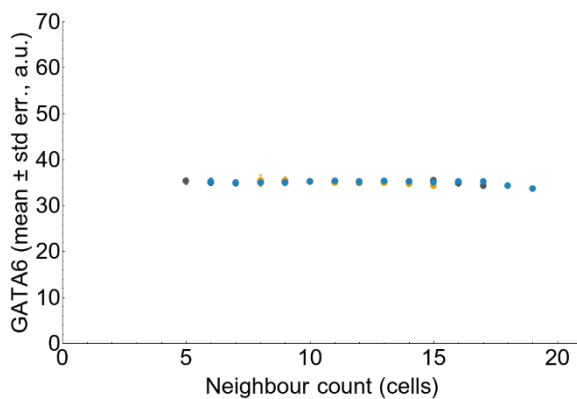

**B**

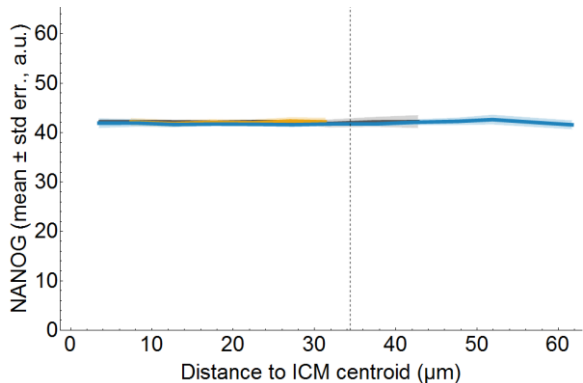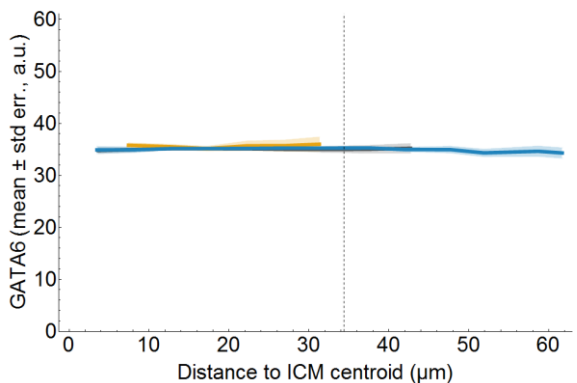

**C**

| NANOG levels at position (late blastocysts) | 25 µm-29.9 µm | 30 µm-34.9 µm | 35 µm-39.9 µm | 40 µm-44.9 µm |
|---------------------------------------------|---------------|---------------|---------------|---------------|
| 10 µm-14.9 µm                               | *             | *             | *             | *             |
| 15 µm-19.9 µm                               | ns            | *             | *             | *             |
| 20 µm-24.9 µm                               | ns            | *             | *             | *             |
| 25 µm-29.9 µm                               | <del>ns</del> | ns            | *             | *             |

| GATA6 levels at position (late blastocysts) | 25 µm-29.9 µm | 30 µm-34.9 µm | 35 µm-39.9 µm | 40 µm-44.9 µm | 45 µm-49.9 µm |
|---------------------------------------------|---------------|---------------|---------------|---------------|---------------|
| 5 µm-9.9 µm                                 | ns            | ns            | *             | ns            | ns            |
| 10 µm-14.9 µm                               | *             | *             | *             | *             | *             |
| 15 µm-19.9 µm                               | ns            | *             | *             | ns            | ns            |
| 20 µm-24.9 µm                               | ns            | ns            | *             | ns            | ns            |
| 25 µm-29.9 µm                               | <del>ns</del> | ns            | *             | ns            | ns            |
