# Supplementary material for: The transition from local to global patterns governs the differentiation of mouse blastocysts
Source: PLOS journal article supplement (doi:10.1371/journal.pone.0233030), 2020-05-15
Supplement: S10 (10.1371/journal.pone.0233030.s010) [file journal.pone.0233030.s010.pdf]

**Fig. S9****A**

| NANOG levels at position (mid blastocysts) | 25 $\mu\text{m}$ -29.9 $\mu\text{m}$ | 30 $\mu\text{m}$ -34.9 $\mu\text{m}$ |
|--------------------------------------------|--------------------------------------|--------------------------------------|
| 5 $\mu\text{m}$ -9.9 $\mu\text{m}$         | *                                    | *                                    |
| 10 $\mu\text{m}$ -14.9 $\mu\text{m}$       | *                                    | *                                    |

**B**

| NANOG levels at position (late blastocysts) | 25 $\mu\text{m}$ -29.9 $\mu\text{m}$ | 30 $\mu\text{m}$ -34.9 $\mu\text{m}$ | 35 $\mu\text{m}$ -39.9 $\mu\text{m}$ |
|---------------------------------------------|--------------------------------------|--------------------------------------|--------------------------------------|
| 0 $\mu\text{m}$ -4.9 $\mu\text{m}$          | ns                                   | *                                    | *                                    |
| 5 $\mu\text{m}$ -9.9 $\mu\text{m}$          | *                                    | *                                    | *                                    |
| 10 $\mu\text{m}$ -14.9 $\mu\text{m}$        | *                                    | *                                    | *                                    |
| 15 $\mu\text{m}$ -19.9 $\mu\text{m}$        | *                                    | *                                    | *                                    |
| 20 $\mu\text{m}$ -24.9 $\mu\text{m}$        | *                                    | *                                    | *                                    |
| 25 $\mu\text{m}$ -29.5 $\mu\text{m}$        | <del>ns</del>                        | *                                    | ns                                   |

**C**

| GATA6 levels at position (late blastocysts) | 25 $\mu\text{m}$ -29.9 $\mu\text{m}$ | 30 $\mu\text{m}$ -34.9 $\mu\text{m}$ | 35 $\mu\text{m}$ -39.9 $\mu\text{m}$ |
|---------------------------------------------|--------------------------------------|--------------------------------------|--------------------------------------|
| 10 $\mu\text{m}$ -14.9 $\mu\text{m}$        | ns                                   | *                                    | *                                    |
| 15 $\mu\text{m}$ -19.9 $\mu\text{m}$        | *                                    | *                                    | *                                    |
| 20 $\mu\text{m}$ -24.9 $\mu\text{m}$        | ns                                   | *                                    | *                                    |
