# Supplementary material for: The transition from local to global patterns governs the differentiation of mouse blastocysts
Source: PLOS journal article supplement (doi:10.1371/journal.pone.0233030), 2020-05-15
Supplement: S11 (10.1371/journal.pone.0233030.s011) [file journal.pone.0233030.s011.pdf]

**Fig. S10**

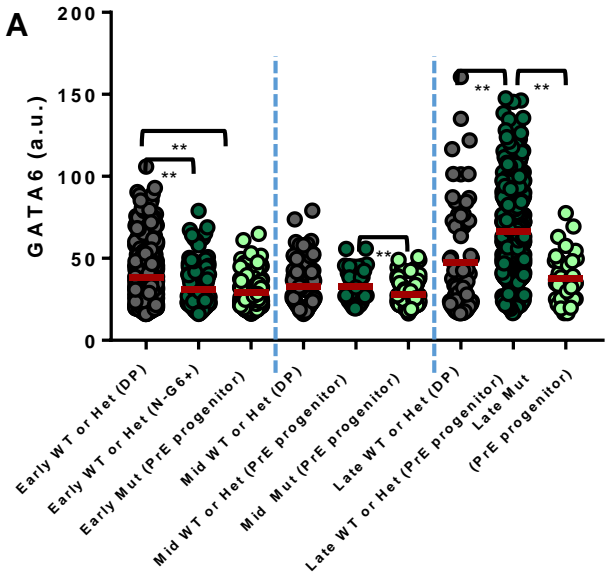

**B**

| GATA6 levels at position (late blastocysts) <i>Nanog</i> <sup>+/+</sup> | 25 μm-29.9 μm | 30 μm-34.9 μm | 45 μm-49.9 μm |
|-------------------------------------------------------------------------|---------------|---------------|---------------|
| 0 μm-4.9 μm                                                             | ns            | *             | ns            |
| 5 μm-9.9 μm                                                             | *             | ns            | ns            |
| 10 μm-14.9 μm                                                           | *             | *             | ns            |
| 15 μm-19.9 μm                                                           | *             | ns            | ns            |
| 25 μm-29.5 μm                                                           | <del>ns</del> | ns            | *             |
| 30 μm-34.9 μm                                                           | ns            | ns            | *             |
