# Supplementary material for: The transition from local to global patterns governs the differentiation of mouse blastocysts
Source: PLOS journal article supplement (doi:10.1371/journal.pone.0233030), 2020-05-15

**Fig. S12**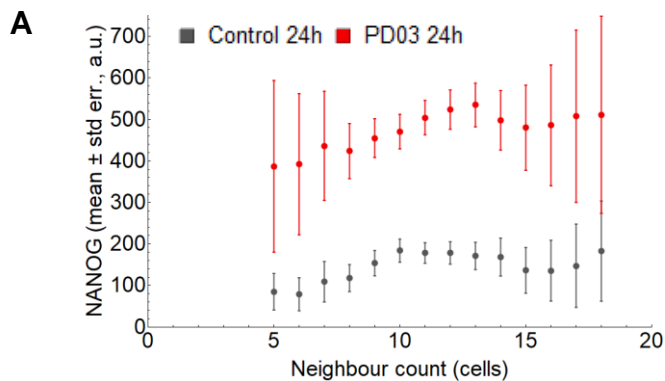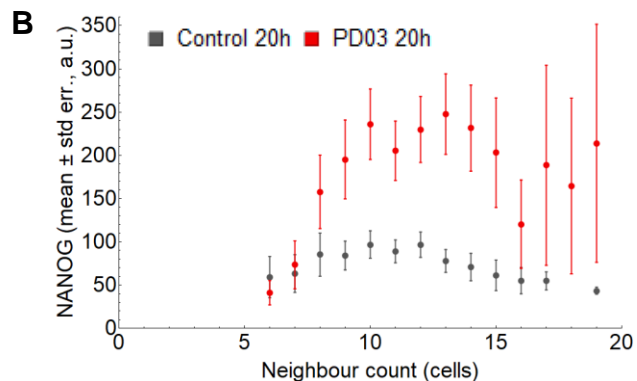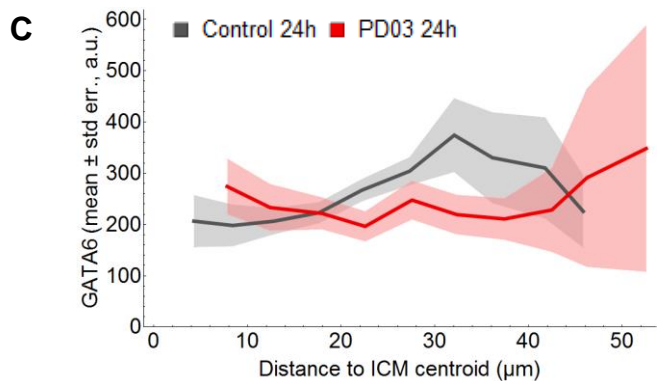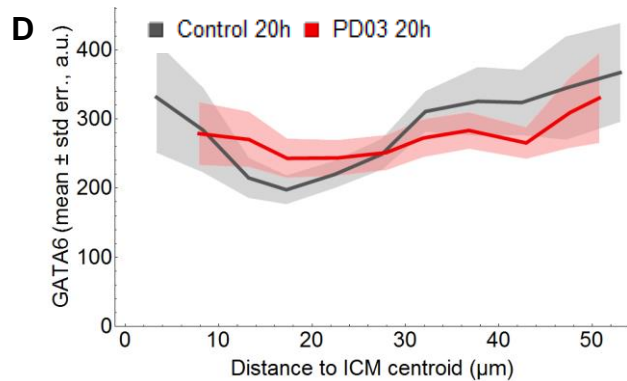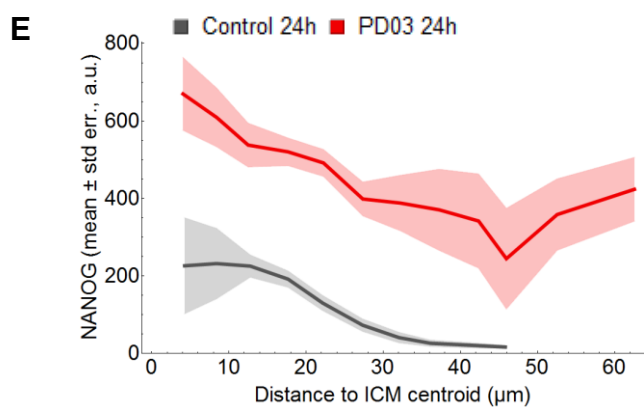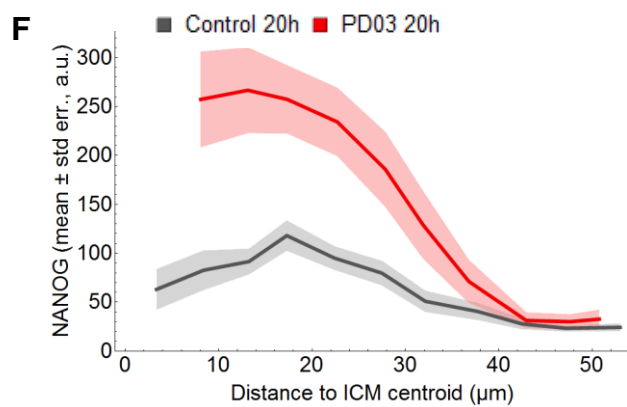

Supplement: S13 (10.1371/journal.pone.0233030.s013) [file journal.pone.0233030.s013.pdf]
