# Supplementary material for: The transition from local to global patterns governs the differentiation of mouse blastocysts
Source: PLOS journal article supplement (doi:10.1371/journal.pone.0233030), 2020-05-15
Supplement: S16 (10.1371/journal.pone.0233030.s016) [file journal.pone.0233030.s016.pdf]

# Sup. Table 1: Number of analysed embryos

| Data |                                                            | Number of embryos |     |      | Number of cells in embryos |      |      | Number of cells in ICM |     |      | Number of cells in analysis (ICM+TE neighbours) |      |      | Mean number per DCG |       |        |
|------|------------------------------------------------------------|-------------------|-----|------|----------------------------|------|------|------------------------|-----|------|-------------------------------------------------|------|------|---------------------|-------|--------|
|      |                                                            | early             | mid | late | early                      | mid  | late | early                  | mid | late | early                                           | mid  | late | early               | mid   | late   |
| I    | Our WT                                                     | 24                | 4   | 16   | 1124                       | 302  | 2329 | 485                    | 96  | 712  | 994                                             | 203  | 1638 | 41.42               | 50.75 | 102.38 |
| II   | Saiz <i>et al</i> WT                                       | 64                | 34  | 49   | 3033                       | 2596 | 5903 | 1157                   | 918 | 1994 | 2487                                            | 1824 | 4089 | 38.86               | 53.65 | 83.45  |
| III  | <i>Nanog</i> <sup>+/+</sup> or <i>Nanog</i> <sup>+/-</sup> | 44                | 7   | 22   | 2159                       | 493  | 2779 | 830                    | 167 | 860  | 1901                                            | 377  | 2061 | 43.20               | 53.86 | 93.68  |
| IV   | <i>Nanog</i> <sup>-/-</sup>                                | 12                | 5   | 2    | 657                        | 348  | 207  | 251                    | 132 | 46   | 582                                             | 280  | 125  | 48.50               | 56.00 | 62.50  |
| V    | treatment control (24 h)                                   | 0                 | 1   | 15   | 0                          | 81   | 1735 | 0                      | 25  | 449  | 0                                               | 32   | 852  | 0                   | 32.00 | 56.80  |
| VI   | treatment control (20 h)                                   | 0                 | 1   | 12   | 0                          | 74   | 1329 | 0                      | 20  | 435  | 0                                               | 36   | 946  | 0                   | 36.00 | 78.83  |
| VII  | treatment PD03 (24 h)                                      | 0                 | 0   | 11   | 0                          | 0    | 1194 | 0                      | 0   | 447  | 0                                               | 0    | 657  | 0                   | 0.00  | 59.73  |
| VIII | treatment PD03 (20 h)                                      | 0                 | 1   | 7    | 0                          | 74   | 740  | 0                      | 46  | 292  | 0                                               | 74   | 497  | 0                   | 74.00 | 71.00  |
