# Supplementary material for: The transition from local to global patterns governs the differentiation of mouse blastocysts
Source: PLOS journal article supplement (doi:10.1371/journal.pone.0233030), 2020-05-15
Supplement: S17 (10.1371/journal.pone.0233030.s017) [file journal.pone.0233030.s017.pdf]

## Sup. Table 2: Number of analysed cells

| Data |                                                            | early |     |              |              | mid |     |              |              | late |     |              |              |
|------|------------------------------------------------------------|-------|-----|--------------|--------------|-----|-----|--------------|--------------|------|-----|--------------|--------------|
|      |                                                            | DN    | DP  | Epi<br>prog. | PrE<br>prog. | DN  | DP  | Epi<br>prog. | PrE<br>prog. | DN   | DP  | Epi<br>prog. | PrE<br>prog. |
| I    | Our WT                                                     | 23    | 280 | 145          | 37           | 6   | 34  | 33           | 23           | 170  | 0   | 201          | 341          |
| II   | Saiz <i>et al</i> WT                                       | 37    | 841 | 133          | 146          | 20  | 429 | 138          | 331          | 252  | 200 | 524          | 1018         |
| III  | <i>Nanog</i> <sup>+/+</sup> or <i>Nanog</i> <sup>+/-</sup> | 26    | 627 | 27           | 150          | 6   | 90  | 32           | 39           | 153  | 66  | 198          | 443          |
| IV   | <i>Nanog</i> <sup>-/-</sup>                                | 12    | 5   | 0            | 234          | 2   | 0   | 0            | 130          | 3    | 5   | 0            | 38           |
| V    | treatment control (24 h)                                   | 0     | 0   | 0            | 0            | 1   | 2   | 9            | 13           | 82   | 8   | 151          | 208          |
| VI   | treatment control (20 h)                                   | 0     | 0   | 0            | 0            | 0   | 0   | 8            | 12           | 84   | 6   | 108          | 237          |
| VII  | treatment PD03 (24 h)                                      | 0     | 0   | 0            | 0            | 0   | 0   | 0            | 0            | 18   | 25  | 323          | 81           |
| VIII | treatment PD03 (20 h)                                      | 0     | 0   | 0            | 0            | 0   | 0   | 12           | 34           | 9    | 26  | 128          | 129          |
